# Supplementary material for: Comparative Analysis of Primary (3R/4R) versus Secondary (3R + 4R) Tauopathy Strains in Rodent Models: A Systematic Review
Source: Research Square preprint supplement (doi:10.21203/rs.3.rs-8090222/v1), 2025-12-02
Supplement: Supplementary file 1 [file 54c930710188324af288be31.xlsx]

## Sheet: SYRCLE
Study ID	Sequence Generation	Baseline Characteristics	Allocation Concealment	Random Housing	Blinding of Caregivers	Random Outcome Assessment	Incomplete Outcome Data	Selective Outcome Reporting	Other Bias (Injection Characterization)	Housing Post-Injection
Taniguchi et al., 2024	High	Low	High	Unclear	Unclear	High	Low	Low	Unclear	Unclear
Narasimhan et al., 2017	High	Low	High	Unclear	Unclear	High	Low	Low	Unclear	Unclear
Hosokawa et al., 2022	Unclear	Low	Unclear	Unclear	Unclear	Unclear	Low	Unclear	Low	Unclear
Clavaguera et al., 2013	Unclear	Low	Unclear	Unclear	Unclear	Unclear	Low	Unclear	Low	Unclear
Kaufman et al., 2016	Unclear	High	Unclear	Unclear	Unclear	Low	Low	Low	Unclear	Unclear
Boluda et al., 2015	Unclear	Low	Unclear	Unclear	Unclear	Unclear	Low	Low	Low	High
Ferrer et al., 2022	Unclear	Low	Unclear	Unclear	Unclear	Unclear	Unclear	Low	Low	Unclear
Ondrejcak et al., 2023	Unclear	Low	Unclear	Unclear	Unclear	Unclear	Unclear	Low	Low	Unclear
