# Supplementary material for: Comparative Analysis of Primary (3R/4R) versus Secondary (3R + 4R) Tauopathy Strains in Rodent Models: A Systematic Review
Source: Research Square preprint supplement (doi:10.21203/rs.3.rs-8090222/v1), 2025-12-02
Supplement: Supplementary file 2 [file 646a0fae313cce76562cf2e9.docx]

**Web of Science core collection** 446 Articles

Title or abstract or keywords=(tau AND (aggregat* OR propagat*) AND (inject* OR seed* OR inoculat*) AND (mouse OR rat OR "animal model"))

**MedLine (via PubMed)** 315 Articles

(tau[tiab]

AND (aggregat*[tiab] OR propagat*[tiab])

AND (inject*[tiab] OR seed*[tiab] OR inoculat*[tiab])

AND (mouse[tiab] OR rat[tiab] OR "animal model"[tiab]))

**Elsevier Scopus** 675 Articles

TITLE-ABS-KEY(

tau

AND (aggregat* OR propagat*)

AND (inject* OR seed* OR inoculat*)

AND (mouse OR rat OR "animal model")

)
