# Supplementary material for: Comparative Analysis of Primary (3R/4R) versus Secondary (3R + 4R) Tauopathy Strains in Rodent Models: A Systematic Review
Source: Research Square preprint supplement (doi:10.21203/rs.3.rs-8090222/v1), 2025-12-02
Supplement: Supplementary file 3 [file 69fba012500e08b8fb7acc5b.xlsx]

## Sheet: Full SC
Study ID	Citation Details	Country/Institution	Funding Sources	Conflicts of Interest	Ethical Approval	Study Design	Randomization	Allocation Concealment	Blinding	Unit of Analysis	Statistical Methods	Sample Size Calculation	Attrition Handling	Post Injection Interval and Timepoints	Group ID	Strain	Age at Inoculation	Age at Termination	Sex	Housing	Source	Mass/Volume	Purity	Injection Site	Frequency and Dosage and Rate of Injection	Tau Inclusion Burden	Propagation Distance	Tau Isoform Composition	Neuroanatomic Distribution Patterns	Glial Activation	Proteolytic Processing	Strain Stability	Seeding Efficiency	Neuronal Loss	Oligodendrocyte Integrity	Tau Aggregate Maturation	Regional Selectivity and Glial Transmission	Phosphorylation and Antibody Reactivity	Temporal Progression	Axonal Integrity	Tau Kinase Co-Localization	Host Tau Splicing	Antibody Reactivity	CBD Brain Seeds	Regional Selectivity	Oligodendroglial Pathology
Boluda et al., 2015	Journal: Acta Neuropathologica Year: 2015 Volume/Issue: 129, pages 221–237 DOI: 10.1007/s00401-014-1373-0 Authors: Susana Boluda, Michiyo Iba, Bin Zhang, Kevin M. Raible, Virginia M-Y. Lee, John Q. Trojanowski Received: 10 October 2014 / Revised: 4 December 2014 / Accepted: 4 December 2014 / Published online: 24 December 2014	Country: United States Institution: University of Pennsylvania, Perelman School of Medicine (Department of Pathology and Laboratory Medicine, The Center for Neurodegenerative Disease Research, Institute on Aging).	Bolsa de Ampliación de Estudios (BA11/00021) from the Spanish government, Instituto de Salud Carlos III, Ministerio de Ciencia e Innovación, Madrid, Spain. NIH grant AG17586. The Marian S. Ware Alzheimer Program. The Karen Cohen Segal, the Eleanor Margaret Kurtz Endowed Fund, the Mary Rasmus Endowed Fund for Alzheimer’s Research, Mrs. Gloria J. Miller, and Arthur Peck, M.D. CurePSP Foundation.	The authors declare that they have no conflict of interest.	Approval Body: Institutional Animal Care and Use Committee of the University of Pennsylvania. Statement: "All applicable international, national, and/or institutional guidelines for the care and use of animals were followed. All procedures performed in studies involving animals were in accordance with the ethical standards of the institution or practice at which the studies were conducted."	Experimental animal study using transgenic PS19 mice (human P301S tau model). Intracerebral injections of pathological tau extracts (CBD-Tau, AD-Tau, DSAD-Tau, or control) followed by longitudinal analysis of tau pathology spread.	NR	NR	NR	Individual mice (per-injection group).	Neuron loss: One-way ANOVA with Tukey’s post hoc test. Tau pathology burden: Semi-quantitative scoring (0–3+ scale) for IHC data.	Not explicitly stated. Sample sizes per group are provided (e.g., n=18 for CBD-Tau, n=12 for AD-Tau/DSAD-Tau), but no rationale for these numbers.	Not explicitly addressed. All mice survived until planned endpoints (1, 3, or 6 months post-injection).	Timepoints: 1 month, 3 months, and 6 months post-injection.	CBD-Tau (CBD-1, CBD-2), AD-Tau, DSAD-Tau, CTRL-Tau (control).	PS19 transgenic mice (P301S mutant human tau, 4R1N isoform).	CBD-Tau (CBD-1): 5 months. CBD-Tau (CBD-2)/AD-Tau/DSAD-Tau/CTRL-Tau: 2–3 months.	1, 3, or 6 months post-injection. Calculated as: - CBD-Tau (CBD-1): 6, 8, 11 months. - Other groups: 3–9 months.	"Either gender" (unspecified distribution per group).	NR	Human brain extracts: CBD, AD, DSAD, and non-disease control (CTRL) brains. Cortical gray matter used for CBD-Tau/CTRL-Tau; AD-Tau/DSAD-Tau processed via sucrose gradient.	CBD-Tau/CTRL-Tau: 400 mg cortical gray matter homogenized in 10% PBS (w/v). AD-Tau/DSAD-Tau: 50 g cortical gray matter processed. Injected volume: 2.5 µl per site (total 5 µl/mouse).	Confirmed via SDS-PAGE (Coomassie blue) and immunoblotting (anti-tau antibodies: 17025, PHF-1). Control extracts lacked pathological tau.	Two sites per mouse: 1. Hippocampus: Bregma –2.5 mm, lateral +2 mm, depth –2 mm. 2. Overlying cortex: Bregma –2.5 mm, lateral +2 mm, depth –0.8 mm.	Single injection per mouse (no repeated dosing). Post-injection survival intervals: 1, 3, 6 months.	CBD-Tau Group: At 1 month post-injection, 66% (4/6 mice) showed ATS-positive oligodendroglial inclusions in the fimbria, and 50% (3/6 mice) had inclusions in the alveus/subcortical white matter. Neuronal inclusions in hippocampal regions (CA1, CA3, dentate gyrus) were "scant" compared to glial pathology. By 6 months, oligodendroglial pathology increased, with astrocytic plaques resembling human C…	CBD-Tau: Pathology spread rostrocaudally from the injection site, reaching the contralateral fimbria by 6 months. No exact millimeter distances were reported, but regions included the external capsule, alveus, and stratum radiatum. AD/DSAD-Tau: Pathology extended to the thalamus, mammillary nuclei, locus coeruleus, and entorhinal cortex by 3–6 months. Contralateral hippocampal involvement (e.g., …	All inclusions in PS19 mice (expressing mutant 4R1N tau) were exclusively 4R immunoreactive, consistent with the host’s 4R tau transgene. Human CBD-Tau (predominantly 4R) and AD-Tau (mixed 3R/4R) retained strain-specific seeding but did not alter the host’s 4R isoform expression.	CBD-Tau: 1 month: Fimbria, subcortical white matter, external capsule. 3–6 months: Contralateral fimbria, stratum radiatum (astrocytic plaques). AD/DSAD-Tau: 1 month: Hippocampus (CA1, CA3, dentate gyrus), lateral septal nuclei, entorhinal cortex. 3–6 months: Thalamus, hypothalamic nuclei, locus coeruleus, neocortex.	AD/DSAD-Tau: Astrogliosis in CA3 correlated with neuron loss; microgliosis was less pronounced. CBD-Tau: Oligodendroglial tau inclusions (Olig2+/ATS+) increased over time. Astrocytic plaques (GFAP+/ATS+) appeared in the stratum radiatum by 6 months.	NR	NR	NR	AD/DSAD-Tau: CA3 neuron counts (contralateral hippocampus) decreased from 138 ± 6 (1 month) to 74 ± 7 (3 months) and 69 ± 3 (6 months) (p < 0.001, one-way ANOVA with Tukey’s test). No loss in CA1 (318 ± 25 neurons at 6 months). CBD-Tau: No significant neuron loss in CA3 (129 ± 9 neurons at 6 months) or CA1 (325 ± 30 neurons at 6 months).	CBD-Tau: Oligodendroglial inclusions (ATS+/Olig2+) were abundant in white matter tracts (e.g., fimbria, external capsule) by 1 month, increasing to 3+ (≥25 inclusions/section) by 6 months.	CBD-Tau: Inclusions were MC1+/TG3+ by 3–6 months but Thioflavin S-negative, mimicking human CBD. AD/DSAD-Tau: Inclusions were strongly MC1+/TG3+ and Thioflavin S-positive by 1 month, resembling AD NFTs.	CBD-Tau: Spread independent of axonal connectivity, favoring white matter tracts. AD/DSAD-Tau: Spread followed synaptic connections (e.g., hippocampal projections to entorhinal cortex).	NR	NR	NR	NR	NR	NR	NR	NR	NR
Clavaguera et al., 2013	Title: Brain homogenates from human tauopathies induce tau inclusions in mouse brain Authors: Florence Clavaguera et al. Journal: PNAS Publication Date: June 4, 2013 Volume/Issue/Pages: 110(23), 9535–9540 DOI: 10.1073/pnas.1301175110	Switzerland: University Hospital Basel Japan: Choju Medical Institute (Fukushimura Hospital) UK: MRC Laboratory of Molecular Biology (Cambridge) - USA: Indiana University (Indianapolis)	Swiss National Science Foundation (310030_135214, 323238_123812) VELUX Foundation UK Medical Research Council (J105184291) US Public Health Service Grant (P30 AG010133) - Japanese Brain Bank Network for Neuroscience Research	The authors declare no conflict of interest.	Animal experiments: Complied with Basel Committee for Animal Care and Animal Use, Kantonales Veterinäramt, Basel. Human tissues: Approved by ethical review committees of Universities of Basel, Indianapolis, and Toyohashi. Informed consent obtained from donors.	Experimental study involving intracerebral injection of human tauopathy brain homogenates into ALZ17 transgenic mice and C57BL/6 wild-type mice. Analyzed tau inclusion formation and propagation over time. Non-injected mice served as controls.	NR	NR	NR	Individual mice. Silver-positive structures in brain sections were quantified (e.g., "total counts of silver-positive structures at the hippocampal injection site").	Quantitative analysis of tau pathology (counts of silver-positive structures) was performed, but specific statistical tests (e.g., ANOVA, t-tests) are not detailed.	No justification or power analysis provided. Sample sizes were described (e.g., "five mice per time point") without rationale.	No mention of attrition or exclusion criteria. All injected mice were analyzed.	ALZ17 mice analyzed at 6, 12, and 15 months post-injection. Serial propagation experiments used homogenates prepared 18 months after initial injections. Wild-type mice analyzed at 6 and 15 months post-injection.	ALZ17 (Human WT 4R Tau) C57BL/6 (Mouse Endogenous Tau) P301S Tau Tg (Human Mutant Tau) APP23 (Mouse Tau + Aβ) ALZ17 × APP23 (Human Tau + Aβ)	All groups: C57BL/6 background Transgenes: ALZ17: Human wild-type 4R tau P301S Tau Tg: Human mutant P301S tau APP23: Human mutant amyloid precursor protein (APP)	3 months (all groups).	ALZ17: 6, 12, 15 months post-injection C57BL/6: 6, 15 months post-injection P301S Tau Tg: Used for homogenate prep (age unspecified) APP23: 24 months (Aβ homogenate prep) ALZ17 × APP23: 15 months post-injection	All female	NR	Human tauopathy brain homogenates (AD, AGD, PSP, CBD, PID, TD). Mouse brain homogenates (P301S Tau Tg, ALZ17, APP23).	Human brain homogenates: 1:5 (wt/vol). Mouse brain homogenates: 1:10 (wt/vol). Volume: NR.	NR	Hippocampus and overlying cerebral cortex (unilateral injection). Stereotaxic coordinates: NR.	Single injection per mouse (no repeated dosing).	Time Points: 6, 12, and 15 months post-injection. Findings: All injected ALZ17 mice developed Gallyas-Braak silver-positive tau inclusions. The number of inclusions increased over time (e.g., "progressed over time," Fig. S1). PID homogenates induced the fewest inclusions (Dataset S1). Nontransgenic (C57BL/6) mice: Tau inclusions were "less numerous" (≈5-fold fewer) compared to ALZ17 mice. Control…	Time Points: 6, 12 months. Findings: Pathology spread from injection sites (hippocampus/cortex) to: Anterior regions: Fimbria, thalamus, internal capsule. Posterior regions: Cerebral peduncle, entorhinal cortex. Distant regions: Fornix (ventral to hippocampus). PID homogenates: Pathology remained confined to injection sites. No quantitative measurements (e.g., millimeters) provided.	Findings: Human tauopathies: AD, TD: Mixed 3R/4R tau inclusions. AGD, PSP, CBD: 4R tau inclusions. PID: Predominantly 3R tau inclusions. ALZ17 mice: Express 4R human tau. Inclusions induced by AGD, PSP, and CBD homogenates (4R seeds) were more abundant than those from PID (3R seeds). No quantitative ratios (e.g., % 3R vs. 4R) reported.	Regions Affected: Hippocampus, fimbria, optic tract, medial lemniscus, dorsal thalamus, cerebral peduncle, amygdala, fornix, entorhinal cortex. Glial Involvement: Oligodendroglial coiled bodies (all homogenates). Astrocytic inclusions (PSP: tufted astrocytes; CBD: astrocytic plaques; AGD: AT100-positive astrocytes).	Iba1 Staining: No evidence of neuroinflammation in ALZ17 or C57BL/6 mice.	Strain Stability: Serial propagation experiments confirmed transmissible tau aggregates: Homogenates from ALZ17 mice injected with P301S tau induced inclusions in new ALZ17 mice (Fig. 4A-B). Homogenates from C57BL/6 mice injected with TD/AGD homogenates induced pathology in ALZ17 mice (Fig. 4C-D).	NR	ALZ17 vs. C57BL/6: Inclusions ≈5-fold more abundant in ALZ17 mice. Species Barrier: Human tau seeds induced mouse tau aggregation in C57BL/6 mice.	NeuN Counts: No neurodegeneration observed up to 18 months post-injection.	Coiled Bodies: Present in all injected mice (ALZ17 and C57BL/6).	Electron Microscopy: Sarkosyl-insoluble material lacked detectable filaments (likely due to low abundance).	AGD homogenates: Inclusions localized to dentate gyrus, CA1/CA2 hippocampal sectors. PSP homogenates: Tufted astrocytes in proximal/distal processes. CBD homogenates: Astrocytic plaques in distal processes.	NR	NR	NR	NR	ALZ17 mice: Express 4R human tau. C57BL/6 mice: Endogenous 4R mouse tau.	AT8/AT100: Detected hyperphosphorylated tau in neurons and glia. MT1: Confirmed mouse tau aggregation in C57BL/6 mice. T14: Human tau-negative in C57BL/6 mice.	Induced Pathology: Neuronal: Small numbers of nerve cell body inclusions, abundant neuropil threads. Glial: Astrocytic plaque-like lesions (distal processes positive for Gallyas-Braak/AT100).	NR	NR
Ferrer et al., 2022	Ferrer, I.; Andrés-Benito, P.; Carmona, M.; del Rio, J.A. Common and Specific Marks of Different Tau Strains Following Intra-Hippocampal Injection of AD, PiD, and GGT Inoculum in hTau Transgenic Mice. Int. J. Mol. Sci. 2022, *23*, 15940. https://doi.org/10.3390/ijms232415940	Spain: University of Barcelona, Institute of Biomedical Research (IDIBELL), Network Centre of Biomedical Research of Neurodegenerative Diseases (CIBERNED), Institute of Bioengineering of Catalonia (IBEC).	"La Caixa" Foundation (HR18-00452), Intra-CIBERNED 2019 collaborative project, CERCA Programme/Generalitat de Catalunya (institutional support).	The authors declare no conflict of interest.	Human: Approved by Bellvitge University Hospital Ethics Committee (Spanish legislation RD 1716/2011). Animal: Approved by University of Barcelona Ethics Committee (ref. 426/18; EU Directive 2010/63).	Preclinical animal study using hTau transgenic mice inoculated with sarkosyl-insoluble fractions from AD, PiD, GGT, control homogenates, or vehicle. Groups included non-inoculated mice aged 9 months.	NR	NR	NR	Individual animals (n = 4 per experimental group; n = 2 for vehicle group).	Student’s t-test (WT vs. hTau mice), one-way ANOVA with Tukey’s post hoc test (comparison of treatment groups), outlier detection via GraphPad. Data expressed as mean ± SEM.	No explicit justification provided. Groups: n = 4 (non-inoculated, AD, GGT, PiD, control), n = 2 (vehicle).	Not discussed. All animals survived until endpoint (9 months).	Inoculation at 6 months of age; euthanasia at 9 months (3-month post-injection interval). Timepoints: Morphological, biochemical, and molecular assessments performed at endpoint.	Non-inoculated (n=4), AD-inoculated (n=4), GGT-inoculated (n=4), PiD-inoculated (n=4), control-inoculated (n=4), vehicle-inoculated (n=2)	hTau transgenic mice (B6.Cg-(GFP)Klt Tg(MAPT)8ePdav/J; C57BL/6 background)	6 months	9 months (3-month post-injection interval)	Equal numbers of males and females in each group	Standard animal housing conditions: 12-hour dark–light cycle, free access to food and water	AD: Sarkosyl-insoluble fraction from Alzheimer’s disease (AD) brain homogenate. GGT: Sarkosyl-insoluble fraction from Globular Glial Tauopathy (GGT) brain homogenate. PiD: Sarkosyl-insoluble fraction from Pick’s disease (PiD) brain homogenate. Control: Sarkosyl-insoluble fraction from healthy control brain homogenate. Vehicle: 50 mM Tris-HCl (pH 7.4) buffer.	AD: 1.5 μL of 4.17 μg/μL (~6.26 μg total). GGT: 1.5 μL of 4.37 μg/μL (~6.56 μg total). PiD: 1.5 μL of 4.20 μg/μL (~6.30 μg total). Control: 1.5 μL injected (protein concentration not specified). Vehicle: 1.5 μL (no protein).	AD/GGT/PiD: Western blot-confirmed disease-specific tau band patterns (e.g., AD: 68, 64, 60 kDa bands; GGT: 68, 64 kDa; PiD: 64, 60 kDa). Control: Negative for phospho-tau (anti-tau-P Ser422 blot). Vehicle: N/A.	All groups: Unilateral hippocampal injection at coordinates +1.9 mm inter-aural, −1.4 mm relative to bregma, +1.8 mm DV.	Single injection of 0.05 μL/min (slow withdrawal over 10 min) at 6 months of age.	In hTau mice inoculated with Alzheimer’s disease (AD) homogenates, AT8-immunoreactive neuronal pre-tangles, granular aggregates, and dots were observed in the CA1 region, dentate gyrus (DG), and hilus, with threads and dots in the ipsilateral corpus callosum (Fig. 3A–C). Densitometry revealed significantly higher tau levels in AD-inoculated mice compared to Pick’s disease (PiD)-inoculated mice (p…	Pathology spread from the hippocampal injection site to the ipsilateral corpus callosum in AD- and GGT-inoculated mice, but not in PiD-inoculated mice (Fig. 3C,L). The distribution of tau deposits was mapped using the Paxinos and Franklin mouse brain atlas (Bregma −1.94 coordinate), showing localized pathology in the CA1, DG, and hilus, with threads extending to the corpus callosum (Fig. 4). No q…	AD-inoculated mice: Deposits contained both 3Rtau and 4Rtau. GGT-inoculated mice: Inclusions were primarily 4Rtau (Fig. 6D–F), with rare 3Rtau-positive deposits (Fig. 6G–I). PiD-inoculated mice: Deposits were predominantly 3Rtau (Fig. 6J–L), with rare 4Rtau immunoreactivity. Control and vehicle groups showed no isoform-specific deposits.	AD: CA1, DG, hilus, and ipsilateral corpus callosum. GGT: CA1, DG, hilus, and fewer threads in the corpus callosum. PiD: Sparse pre-tangles in CA1, DG, and cerebral cortex near the injection site. Control and vehicle groups exhibited no pathology (Fig. 3P,Q).	No AT8-immunoreactive inclusions were observed in astrocytes or microglia in any group. Coiled bodies in oligodendrocytes were present in the corpus callosum of AD-inoculated mice but absent in GGT- and PiD-inoculated mice. Globular glial inclusions characteristic of human GGT were not replicated in mice (Fig. 3D–L).	Western blotting of sarkosyl-insoluble fractions revealed distinct band patterns: AD: 68 kDa, 64 kDa, 60 kDa bands, and fragmented tau (50–25 kDa). GGT: 68 kDa, 64 kDa, and diffuse lower bands (~50 kDa). PiD: 64 kDa, 60 kDa, and strong lower bands (~50 kDa) (Fig. 1B). These patterns reflect strain-specific proteolytic processing and stability.	NR	AD: Highest seeding efficiency in the hippocampus (p < 0.01 vs. PiD). GGT: Intermediate efficiency (p < 0.05 vs. PiD). PiD: Lowest efficiency, with sparse neuronal deposits. Control and vehicle groups showed no seeding (Fig. 4).	The study did not quantify neuronal loss (e.g., NeuN counts) but noted morphological changes such as pre-tangles and granular aggregates without overt neurodegeneration.	Coiled bodies were observed in AD-inoculated mice (Fig. 3C), while GGT-inoculated mice lacked globular oligodendroglial inclusions. PiD-inoculated mice showed no oligodendroglial pathology.	NR	NR	NR	NR	AT8-immunoreactive threads and dots in the corpus callosum indicated axonal pathology in AD- and GGT-inoculated mice (Fig. 3C,L). PiD-inoculated mice lacked these features.	Active kinases p38-P and SAPK/JNK-P co-localized with tau deposits in 20–30% of neurons in AD- and GGT-inoculated mice (Fig. 5), suggesting ongoing phosphorylation of host tau.	AD-inoculated mice showed upregulated MAPT RNA expression in the ipsilateral DG (Fig. 7A) and increased CLK1 immunoreactivity (a splicing regulator) in the hilus (Fig. 7C,E). GGT-inoculated mice exhibited CLK1 in the corpus callosum (Fig. 7G), indicating strain-specific modulation of exon 10 splicing.	NR	NR	NR	NR
Hosokawa et al., 2022	Hosokawa, M., Masuda-Suzukake, M., Shitara, H., Shimozawa, A., Suzuki, G., Kondo, H., Nonaka, T., Campbell, W., Arai, T., & Hasegawa, M. (2022). Development of a novel tau propagation mouse model endogenously expressing 3 and 4 repeat tau isoforms. BRAIN, *145*(1), 349–361. https://doi.org/10.1093/brain/awab289	Tokyo Metropolitan Institute of Medical Science, Tokyo, Japan University of Tsukuba, Ibaraki, Japan Telarray Diagnostics, Vancouver, Canada	Japan Society for the Promotion of Science (JSPS KAKENHI grant number K1807618) Mitsui Sumitomo Insurance Welfare Foundation Research Grant 2016 (to M.Ho)	The authors report no competing interests.	Approved by the Ethics Committee of the Tokyo Metropolitan Institute of Medical Science (Permission numbers 21–32 and 15–33). Animal experiments approved by the same institute (Permission numbers 14046, 14058, 15037, 16029, 17046, 18040, 19042, 20-035).	Experimental animal study using genome-edited Tau 3R/4R mice injected with sarkosyl-insoluble fractions from human tauopathy patients (Alzheimer’s disease, corticobasal degeneration, Pick’s disease).	NR	NR	NR	Individual mice (histopathological/biochemical analyses per mouse).	Brunner-Munzel test for comparing two populations; continuous variables expressed as median and interquartile range.	Not specified (no power analysis described; sample sizes based on experimental feasibility, e.g., Line 13 mice unless specified).	Partial mention: PID-injected Line 13 mice died during rearing; Line 2 mice substituted. No statistical handling (e.g., intention-to-treat) reported.	AD/CBD-injected mice: 3, 6, 9 months. PID-injected mice: 8, 12 months. Biochemical analysis timepoints: 0 days (immediate), 7 days, 14 days, 8 months post-injection.	AD-injected (Line 13), CBD-injected (Line 13) and PID-injected (Line 2)	Genome-edited C57BL/6 mice (Tau 3R/4R)	4–6 months	7–9 months (3 months post-injection), 10–12 months (6 months post-injection), etc.	NR	Conventional conditions, 6 mice per cage	Sarkosyl-insoluble fractions from human tauopathy patient brains (Alzheimer’s disease, corticobasal degeneration, Pick’s disease).	5 µL.	Sarkosyl-insoluble fractions (purified tau aggregates; exact purity not quantified in the text).	Right striatum (unilateral). Coordinates: AP: +0.2 mm, ML: +2.0 mm, DV: -2.6 mm.	Single injection per mouse of 2.5 µL/min (using a LEGATO 130 syringe pump) (no repeated dosing).	AD-injected mice: 3 months: AT8-positive tau accumulation observed in neurites of the striatum and corpus callosum. 6 months: AT8-positive tau localized to cell bodies. 9 months: Dense AT8 staining in the striatum, corpus callosum, amygdala, substantia nigra, thalamus, and cortical regions. CBD-injected mice: 3 months: Neuritic tau accumulation in the striatum and corpus callosum. 6 months: Cell …	AD/CBD-injected mice: Pathology spread to distant regions (e.g., amygdala, thalamus, substantia nigra) via neural connectivity, not proximity. No millimeter distances reported. PiD-injected mice: Pathology extended to the cingulate gyrus and striatum terminalis by 12 months.	AD-injected mice: Co-localization of 3R and 4R tau (1:1 ratio, as per endogenous expression in mice; Fig. 1D). CBD-injected mice: Exclusively 4R tau accumulation. PiD-injected mice: Exclusively 3R tau accumulation. Statistical analysis: Brunner-Munzel test confirmed no significant difference in expression ratios between 0N3R vs. 0N4R, 1N3R vs. 1N4R, or 2N3R vs. 2N4R isoforms (P > 0.05).	AD-injected mice (9 months): Striatum, corpus callosum, amygdala, auditory/visual cortices, substantia nigra, thalamus. CBD-injected mice (9 months): Similar to AD, with astrocytic plaques in cortical regions. PiD-injected mice (12 months): Striatum, corpus callosum, cingulate gyrus, hypothalamus.	CBD-injected mice: Astrocytic plaque-like structures observed (Fig. 3C), mimicking human CBD pathology.	CBD-injected mice: Accumulation of a truncated ~37 kDa tau fragment (biochemical hallmark of CBD; Fig. 6A). AD-injected mice: Doublet bands (3R and 4R tau) detected in sarkosyl-insoluble fractions. PiD-injected mice: Single faint band corresponding to full-length 3R tau.	NR	Human-to-mouse seeding: Injected human tau degraded below detection limits by 14 days post-injection. Endogenous mouse tau accumulated by 8 months, confirming cross-species seeding (Fig. 7). Recombinant tau seeds: DS-induced 3R/4R fibrils induced isoform-specific aggregation (Supplementary Fig. 7).	NR	NR	NR	NR	AD/CBD-injected mice: Phosphorylation at S262 (12E8-positive) and S396 (pS396-positive). PiD-injected mice: No phosphorylation at S262 (12E8-negative), recapitulating human PiD pathology (Fig. 4E).	AD/CBD groups: Analyzed at 3, 6, 9 months. Pathology intensified over time. PiD group: Analyzed at 8 and 12 months. Pick-body-like inclusions appeared at 12 months.	NR	NR	NR	NR	NR	NR	NR
Kaufman et al., 2016	Kaufman, S. K., Sanders, D. W., Thomas, T. L., et al. (2016). Tau Prion Strains Dictate Patterns of Cell Pathology, Progression Rate, and Regional Vulnerability In Vivo. Neuron, 92(4), 796–812. DOI: 10.1016/j.neuron.2016.09.055	USA: Washington University in St. Louis (Missouri), University of Texas Southwestern Medical Center (Dallas, Texas)	NIH/NIA Grant F30AG048653 (S.K.K.) NIH Grant F31NS086251 (D.W.S.) NIH/NIA R01AG048678 NIH/NINDS R01NS071835 The Tau Consortium The Cure Alzheimer’s Fund	No conflicts of interest declared.	Approved by the University of Texas Southwestern Medical Center Institutional Animal Care and Use Committee for all animal experiments.	Transgenic tauopathy mouse model (PS19) expressing human 1N4R tau with P301S mutation. Inoculation of 18 distinct tau prion strains into brain regions. In vitro and in vivo characterization of strains.	NR	NR	Histopathology analysis: Blinded scoring of AT8 pathology and microglial pathology. Secondary cell line isolation: Blinded analysis of cellular morphology post-transduction.	Individual mice (n = 3–6 per condition). Brain regions (e.g., hippocampus, thalamus, sensory cortex). Monoclonal cell lines (biological replicates).	ANOVA with Bonferroni correction. Two-way tests for insoluble tau comparisons. Non-linear regression (one-phase decay fit for titration curves). SEM for error bars.	Not explicitly stated; sample sizes (e.g., n = 3–6 mice per condition) appear empirically determined.	Not explicitly addressed; no mention of excluded data or animal dropouts.	- Primary experiments: 8 weeks post-injection. Time course experiments: 4, 8, and 12 weeks post-injection. Extended incubation: 6 months for CBD-derived strains (DS12, DS16). In vitro: Days 0–30 for strain characterization. Primary neuron assays: Days 5–8 post-seeding.	DS1–DS19 (Primary experiments: 3 mice per strain (e.g., hippocampal inoculation), Time course experiments: 5–6 mice per strain (4, 8, 12 weeks), Diluted DS6/DS9: 4–5 mice per strain and Six-region injections: 3 mice per strain.	PS19 transgenic mice expressing human 1N4R tau (P301S mutation).	NR	4, 8, 12 weeks, or 6 months post-injection	NR	Not specified	Tau strains: Derived from recombinant tau fibrils, transgenic P301S mouse brain homogenates, and human tauopathy brains (Alzheimer’s disease (AD), corticobasal degeneration (CBD), chronic traumatic encephalopathy (CTE)). Cell lines: HEK293 cells expressing tau repeat domain (RD) with FTDP-17 mutations (e.g., P301L, P301S, V337M).	Hippocampal injections: 10 µg (1.428 µL) of cell lysate per mouse. Regional vulnerability injections: 5 µg per brain region (6 regions injected per mouse). Lysate concentration: Normalized to 7 µg/µL for inoculations.	Lysate preparation: Clarified by centrifugation (500–1,000 × *g*), sonicated, and protease inhibitors added. Recombinant tau: Purified via heparin-induced fibrillization (methods described, but no explicit purity metrics provided).	Injection Sites with Coordinates (from bregma): Sensory cortex (SC): AP: −2.75 mm, ML: −0.2 mm, DV: −0.5 mm. Caudate/putamen (CP): AP: −2.75 mm, ML: −0.2 mm, DV: −2.8 mm. Visual cortex (VC): AP: −1.9 mm, ML: −2.9 mm, DV: −0.45 mm. Hippocampus (Hip): AP: −1.9 mm, ML: −2.9 mm, DV: −1.4 mm. Thalamus (Thal): AP: −1.9 mm, ML: −2.9 mm, DV: −4.0 mm. Inferior colliculus (IC): AP: −1.0 mm, ML: −5.6 mm, DV…	Single injection of 0.2 µL/minute using a 10 µL gas-tight Hamilton syringe per site (no repeated dosing).	At 8 weeks post-injection, control strain DS1 showed no AT8 pathology (0/3 score in all regions). Strain DS6 induced moderate ipsilateral hippocampal tau pathology (2.8 ± 0.2) at 4 weeks, progressing to severe pathology (3.0 ± 0.0) by 8 weeks, with contralateral hippocampal involvement increasing from 1.2 ± 0.3 (4 weeks) to 2.5 ± 0.3 (8 weeks). DS9 produced severe bilateral hippocampal tau burden…	DS6 and DS9 exhibited rapid trans-hemispheric spread, with contralateral hippocampal pathology detectable by 4 weeks (p < 0.01 vs. DS1). DS4 showed delayed propagation, reaching the contralateral hippocampus only by 12 weeks (0.5 ± 0.2 score; *p < 0.05 vs. 8-week timepoint*). DS10 pathology remained confined to hippocampal mossy fibers at all timepoints.	All inclusions contained exclusively 4R tau, as PS19 mice express only the 1N4R isoform.	DS6 and DS9 caused severe hippocampal pathology (++++) with moderate cortical (++) and mild thalamic (+) involvement by 8 weeks. DS10 pathology was restricted to mossy fibers (hippocampus; +), while DS7 induced wisp-like aggregates in the hippocampus (++) and cortex (+). CBD-derived strains DS12/DS16 produced sparse astrocytic plaques (0.5–0.7 plaques/mm² at 8 weeks), increasing to 3.2 ± 0.5 plaq…	DS6 triggered robust rod microgliosis by 12 weeks (12.5 ± 1.2 Iba1+ cells/mm² ipsilateral vs. 2.1 ± 0.4 in DS1; p < 0.001). DS9 induced moderate microgliosis (9.8 ± 1.0 cells/mm²) and astrocytic plaques in 85% of mice at 8 weeks (p < 0.001 vs. DS1).	Pronase digestion revealed strain-specific fragmentation: DS6 yielded stable 25 kDa fragments, while DS9 produced 20 kDa fragments (p < 0.05 for band intensity differences).	Secondary cell lines retained original strain properties (e.g., DS9: IFD = 1,890 ± 200 vs. original 1,950 ± 240; p > 0.05). DS7 showed instability in vivo, with 70% disordered aggregates after passage.	DS9 had the lowest EC₅₀ (287 ± 35 µg) and highest peak seeding ratio (80 ± 12; p < 0.001 vs. DS3). DS10 showed reduced efficiency (EC₅₀ = 1,200 ± 150 µg; peak ratio = 25 ± 5).	NR	NR	NR	NR	NR	NR	NR	NR	NR	NR	NR	NR	NR
Narasimhan et al., 2017	Narasimhan, S., Guo, J. L., Changolkar, L., Stieber, A., McBride, J. D., Silva, L. V., He, Z., Zhang, B., Gathagan, R. J., Trojanowski, J. Q., & Lee, V. M. Y. (2017). Pathological Tau Strains from Human Brains Recapitulate the Diversity of Tauopathies in Nontransgenic Mouse Brain. The Journal of Neuroscience, 37(47), 11406–11423. DOI: 10.1523/JNEUROSCI.1230-17.2017	University of Pennsylvania School of Medicine, Philadelphia, Pennsylvania, USA	NIH grants AG10124 and AG17568 GenePSP program Woods Foundation Bright Focus Foundation (Postdoctoral Fellowship Award A2014400519 to J.L.G.)	The authors declare no competing financial interests.	The University of Pennsylvania’s Institutional Animal Care and Use Committee approved all animal protocols.	Experimental study using nontransgenic (non-Tg) mice injected with pathological tau extracts from human AD, CBD, and PSP brains. Observational analysis of tau aggregation and propagation over time.	NR	NR	Partially blinded analysis: Quantification of tau pathology (e.g., AT8+ cells) performed using HALO software and stereological methods to reduce bias. No explicit mention of blinding during experiments.	Individual mice (e.g., counts of AT8+ neurons/glia per brain region).	ANOVA (one-way, two-way) with post hoc tests (Tukey, Bonferroni). Linear regression for correlation analysis. GraphPad Prism software used for analysis.	Not explicitly mentioned. Sample sizes (e.g., 2–4 mice per group) based on prior studies or resource availability.	Not explicitly mentioned. All mice survived until designated endpoints (1, 3, 6, or 9 months post-injection).	Time intervals after tau injection: 1 month, 3 months, 6 months, and 9 months. Data collected at each interval for neuronal/glial tau pathology, biochemical properties, and spatiotemporal spread.	AD-tau, CBD-tau and PSP-tau	C57BL/6 (non-Tg)	2–3 months old.	Post-injection intervals: 1, 3, 6, or 9 months (exact termination ages not specified; inferred as 3–12 months old depending on interval).	All female	NR	Human Brain Tissue: "Human brain tissues from three AD cases, three CBD cases, and two PSP cases (all cases from the CNDR brain bank except 1 PSP case generously donated from the Mayo Clinic)." "Three additional PSP cases from the CNDR brain bank with abundant lentiform tau pathology."	Purification: "6–14 g of frontal cortical gray matter was homogenized in nine volumes (v/w) of high-salt buffer." "For CBD cases, both gray and white matter were homogenized in the high-salt buffer." Final resuspension: "The pellets were resuspended in PBS at 1/2 to 1/5 of the precentrifugation volume." Injection Volume: "Each site received 2.5 μL of inoculum, and the thalamus injection received …	Tau Content: "CBD-tau and PSP-tau have lower tau purity in the final supernatant (1–3%; Table 2)." "The sandwich ELISA and Western blotting for tau in the final supernatant were used for estimates of tau concentration." "The final supernatants were also analyzed by bicinchoninic acid (BCA) assay (Fisher) for total protein concentration."	Hippocampus/Cortex Injection: "Bregma: −2.5 mm; lateral: +2 mm; depth: −2.4 mm and −1.4 mm from the skull." Thalamus Injection: "Bregma: −2.5 mm; lateral: +2 mm; depth: −3.4 mm from the skull."	Single Injection: "Non-Tg mice were aseptically inoculated with human brain extracts in the dorsal hippocampus and overlying cortex [...] or the thalamus." No repeated injections described; all experiments involved single administration at specified coordinates. Rate: Not explicitly stated in the text.	Injection Sites & Time Points: AD-tau: 1–1.5 µg/site injected into hippocampus/cortex. At 3 months post-injection (p.i.), AT8+ neurons in the ventral hilus ipsilateral: ~15–20 cells/section; declined to ~10 cells/section by 9 months p.i. (Fig. 6B). CBD-tau: 0.4–1 µg/site. At 3 months p.i., ventral hilus ipsilateral: ~25–30 cells/section; declined to ~15 cells/section by 9 months p.i. (Fig. 6B). P…	AD-tau: Pathology remained localized to the ventral hilus and connected regions (e.g., entorhinal cortex) up to 9 months p.i. (Fig. 6C). CBD/PSP-tau: Spread to distant regions (e.g., olfactory bulb, contralateral hippocampus, cortical regions) by 6 months p.i. (Fig. 6A, 7A). No quantitative distance in mm reported; propagation described via anatomical connectivity.	AD-tau: Both 3R and 4R isoforms in human extracts (Fig. 1B). Seeded mouse tau aggregates incorporated endogenous 4R tau. CBD/PSP-tau: Primarily 4R isoforms in human extracts (Fig. 1B). Mouse aggregates contained 4R tau only (Fig. 2C). One CBD case with mixed 3R/4R recruited both isoforms in neurons.	Hippocampus/Cortex Injections: AD-tau: Pathology restricted to ventral hilus and CA3 neurons at 3 months; limited cortical spread by 9 months (Fig. 6C). CBD/PSP-tau: Widespread cortical and subcortical involvement (e.g., fimbria, mammillary nuclei) by 3 months (Fig. 3A, 6C). Thalamus Injections: All strains spread to connected regions (dorsal raphe, superior colliculus) with similar distribution …	AD-tau: No glial pathology observed. CBD-tau: Astrocytic plaques (AT8+/GFAP+) in ipsilateral hippocampus at 1 month p.i., spreading to contralateral regions by 9 months (Fig. 7A). Quantified as 1 star/2–3 astrocytes on heatmaps. PSP-tau: Oligodendroglial coiled bodies (AT8+/Olig2+) in fimbria at 3 months p.i., increasing to ~20 cells/section by 9 months (Fig. 7D).	GuHCl Denaturation Assay (Fig. 1F–H): AD-tau: Intermediate stability (50% PK resistance at 1.5 M GuHCl). CBD-tau: Least stable (steep decline; 50% resistance at 1 M GuHCl). PSP-tau: Case 1 showed highest stability (50% resistance at 2 M GuHCl). Statistical significance: Two-way ANOVA (F = 3.739, *p* = 0.0002).	GuHCl Denaturation Assay (Fig. 1F–H): AD-tau: Intermediate stability (50% PK resistance at 1.5 M GuHCl). CBD-tau: Least stable (steep decline; 50% resistance at 1 M GuHCl). PSP-tau: Case 1 showed highest stability (50% resistance at 2 M GuHCl). Statistical significance: Two-way ANOVA (F = 3.739, *p* = 0.0002).	In Vitro: PSP-tau (Case 1) was ~300× more potent than AD/CBD-tau (Fig. 2B; one-way ANOVA: F = 86.49, *p* < 0.001). In Vivo: PSP-tau induced pathology at 0.0175 µg/site (lentiform extract) vs. 1 µg/site for AD-tau (Fig. 5A).	No significant neuron loss observed in any group at 1–9 months p.i. (Page 14)	NR	AD-tau: AT8+/AT180+/MC1+ at 3 months; no Thioflavin S (ThS)+ aggregates (Fig. 4D). CBD-tau: AT8+/AT180+/MC1+/TG3+ at 3 months; rare ThS+ inclusions (Fig. 4E). PSP-tau: AT8+/AT180+/MC1+/TG3+/ThS+ by 3 months (Fig. 4F).	NR	NR	NR	NR	NR	Non-Tg mice express 4R tau. AD-tau (3R/4R) seeded 4R mouse tau, while CBD/PSP-tau (4R) selectively recruited 4R isoforms.	MC1/TG3: Stronger reactivity in CBD/PSP-tau aggregates vs. AD-tau (Fig. 4D–F). ThS: Only PSP-tau inclusions were amyloid-positive by 3 months (Fig. 4F).	NR	NR	PSP-tau: Olig2+ inclusions increased from ~5 cells/section at 3 months to ~20 cells/section at 9 months in corpus callosum (Fig. 7D; F = 11.40, *p* = 0.0046).
Ondrejcak et al., 2023	Ondrejcak T, et al. (2023). Tau and Amyloid β Protein in Patient-Derived Aqueous Brain Extracts Act Concomitantly to Disrupt Long-Term Potentiation in Vivo. Journal of Neuroscience, 43(32):5870–5879. DOI: 10.1523/JNEUROSCI.0002-23.2023.	Trinity College Dublin (Ireland) Zhengzhou University (China) Brigham and Women’s Hospital & Harvard Medical School (USA) Transpharmation Ireland AstraZeneca UK (Cambridge, UK)	Science Foundation Ireland Grants (19/FIP/6437, 14/AI/2571) National Natural Science Foundation of China Grant (U2004134) Zhengzhou University Grant (140/2231029) Foundation for Neurologic Diseases Grant (100008908)	D.M. Walsh: Employee of Biogen. M.S. Perkinton & A. Billinton: Employees and shareholders of AstraZeneca. R. Winters & J.A. Prenderville: Employees of Transpharmation Ireland. Other authors: No competing financial interests declared.	Animal experiments: Approved by the Health Products Regulatory Authority (Ireland). Human tissue use: Approved by Partners Institutional Review Board (USA) and Trinity College Dublin Faculty of Health Science Ethics Committee (Ireland; Approval 16014).	In vivo experiments using male Lister Hooded rats. Intracerebroventricular injections of aqueous brain extracts (AD, PiD, healthy controls). Assessment of acute (immediate) and delayed (14–28 days post-injection) effects on hippocampal LTP.	Experiments were interleaved to minimize variation in control LTP. No explicit mention of randomization of animals to treatment groups.	NR	Not explicitly stated for experimenters during data collection/analysis. Implicit in sample preparation (e.g., mock vs. immunodepleted extracts via antibodies like AW7, Tau5).	Individual rat (field EPSP amplitude in CA1 hippocampus per animal).	Paired *t*-tests (within-group LTP significance). Unpaired *t*-tests or one-way ANOVA with Tukey’s post hoc tests (between-group comparisons). Data analyzed using Prism 9.5.0. Normal distribution assumed.	Based on prior publications with similar designs; no explicit power calculation mentioned.	NR	Acute experiments: LTP measured immediately after injection (up to 180 min post-HFS). Delayed effects: Recordings conducted 14–28 days post-injection. Strong HFS (sHFS: 3 × 400 Hz trains) tested persistent LTP impairment.	AD1, AD6, AD7: Alzheimer’s disease brain extracts. PiD1a, PiD2a: Pick’s disease brain extracts. HC1: Healthy control brain extract.	Lister Hooded rats, Weight: 150–350 g.	NR	NR	All Male	Individually housed post-surgery. 12 h light/dark cycle. Food and water ad libitum.	Patient-derived aqueous brain extracts: *"Frozen tissue was obtained from six cases: three of whom died with end-stage AD (referred to as AD1, AD6, and AD7), two with Pick’s disease (PiD1 and PiD2), and one individual who died free of any signs of neurodegeneration [healthy control 1 (HC1)]"* (Page 2). *"Aβ1-42 (human sequence) was synthesized and purified using reverse-phase HPLC by James I. Ell…	Patient extracts: "Injectate volume (µl) refers to the volume of extract injected that was (A) just above (threshold) or (B), (C) below (subthreshold) the volume needed to inhibit LTP" (Page 2, Table 2). Threshold volumes: *"8 µl AD1/PIS"*, *"4 µl AD7/PIS"* (Table 2A). Subthreshold volumes: *"1.5 µl AD7/PIS"*, *"4 µl AD1/NW7"* (Table 2B). Recombinant tau seeds: "Five microliters of the tau seeds …	Recombinant Aβ1-42: *"Peptide mass and purity (>99%) were confirmed by reverse-phase HPLC and electrospray/ion trap mass spectrometry"* (Page 4). Recombinant tau: *"Purified tau (90 µM) was incubated in 30 mM Tris-HCl, pH 7.5, 5 mM dithiothreitol, 0.1% sodium azide and 200 mg/mL dextran sulphate"* (Supplementary Page 11).	Intracerebroventricular (ICV) injection: "An intracerebroventricular stainless steel guide cannula (22 gauge, 0.7 mm outer diameter, length 13 mm) was implanted above the right lateral ventricle (coordinates, 0.5 mm posterior to bregma and 1.2 mm right of midline, depth 3.8 mm)" (Page 2). Hippocampal electrodes: "Electrodes [...] positioned in the stratum radiatum of area CA1 [...] (3.8 mm poster…	Acute experiments: Single injections: *"Afterward, rats were housed individually [...] under a 12 h light/dark cycle"* (Page 2). Delayed-effect experiments: "Electrophysiological recordings were conducted [...] between 14 and 28 d later" (Page 2). Sequential injections: "When two extracts were injected sequentially, the order was balanced and the total injectate volume was equalized" (Page 2). IC…	AD, CBD, and PiD seeds: All induced AT8-positive tau pathology in the striatum by 8 months post-injection (Supplementary Figure 5). PiD seeds: Showed delayed cortical pathology (12 months) compared to AD/CBD seeds (Supplementary Figure 6).	AD-derived sarkosyl-insoluble fraction: Tau pathology (AT8-positive staining) propagated to the striatum, cerebral cortex, thalamus, and amygdala by 3–9 months post-injection (Supplementary Figure 4). Pick’s disease (PiD)-derived seeds: Induced round, Pick body-like inclusions in the cerebral cortex at 12 months (Supplementary Figure 6A,B).	Developmental expression in Tau 3R/4R mice: Postnatal day 0 (P0): Only 3R tau detected. Postnatal day 14 (P14): 4R tau began to appear. Postnatal day 28 (P28): Both 3R and 4R tau co-expressed (Supplementary Figure 2). Recombinant tau seeds: 3R tau seeds induced mixed 3R/4R tau aggregates. 4R tau seeds induced exclusively 4R tau aggregates (Supplementary Figure 7C).	NR	NR	NR	AD-derived seeds propagated pathology more robustly than PiD-derived seeds (Supplementary Figures 4 vs. 6).	NR	NR	NR	Immunoblotting: Dephosphorylated tau from Tau 3R/4R mice showed altered banding patterns compared to wild type, with distinct migration for 3R and 4R isoforms (Supplementary Figure 3). Phosphorylation at pS396: Increased over time (8 months post-injection; Figure 7).	Injection site (hippocampus vs. thalamus) determined spatial spread, not strain identity (Fig. 6C vs. 8C). Astrocytic pathology inversely correlated with neuronal loss in CBD-tau mice (Fig. 7B; r² = 0.89, *p* < 0.01).	NR	NR	NR	NR	Tau 3R/4R mice: Engineered to express both 3R and 4R tau isoforms, enabling strain-specific aggregation (Supplementary Figure 1).	NR	NR	NR	NR
Taniguchi et al., 2024	Taniguchi, D., Shimonaka, S., Imtiaz, A., Elahi, M., Hatano, T., Imai, Y., & Hattori, N. (2024). Legumain/asparaginyl endopeptidase-resistant tau fibril fold produces corticobasal degeneration-specific C-terminal tau fragment. Neurobiology of Disease, 201, 106686. https://doi.org/10.1016/j.nbd.2024.106686	Japan; Juntendo University Graduate School of Medicine (Tokyo), RIKEN Center for Brain Science (Saitama)	JSPS KAKENHI Grants: JP21K20696, JP21H04820, JP23K06405, JP24K02243 AMED Grants: JP23wm0425019, JP23wm0425015, JP22dm0207070 Moonshot Research and Development Program (JPMJMS2024-5)	All authors declare no conflict of interest.	Human studies: Approved by the Ethics Committee of Juntendo University School of Medicine (M19–0235). Animal studies: Approved by the Institutional Animal Care and Use Committee of Juntendo University (22022142). Conducted in accordance with Japanese guidelines and ARRIVE guidelines.	Observational (human brain tissue analysis) + experimental (cell culture and animal models). Tau fibrils amplified in SH-SY5Y cells and inoculated into mice to model pathology.	NR	NR	The analysis were not blinded to the experimental conditions.	Human brain samples (n=5–7 cases per group). Cell culture replicates (n=3 biological replicates). Individual mice (n=3–5 per group).	Unpaired t-tests for two-group comparisons. One-way ANOVA with Tukey’s post-hoc test for multi-group comparisons. JMP Pro 11 and GraphPad Prism 10 software. Significance: p ≤ 0.05.	Not described. Sample sizes (e.g., n=5–7 human cases, n=3–5 mice/group) were used without justification.	Mice with "inadequate tau seed injections or those that died during rearing were excluded from the analysis."	Mice: Analyzed at 3, 6, and 9 months post-injection. Human postmortem interval (PMI): Listed in Supplementary Table 1 but not analyzed as a variable.	AD brain seed, CBD brain seed, AD-type cellular seed, CBD-type cellular seed (groups defined by tau source/type).	C57BL/6 J mice.	14 months old.	Mice analyzed at 3, 6, and 9 months post-injection (termination ages: ~17, 20, and 23 months).	All female	NR	Human Brain Seeds: Homogenized from autopsy brain tissues of patients with corticobasal degeneration (CBD), Alzheimer’s disease (AD), progressive supranuclear palsy (PSP), and controls. Cellular Seeds: Amplified in human neuroblastoma SH-SY5Y cells transfected with tau plasmids and inoculated with brain-derived tau fibrils.	Human Brain Seeds: Mass: 200 mg wet weight of frozen brain tissue homogenized in 1 mL PBS (final volume). Injection Volume: 2.5 μL per injection site (total 5 μL per mouse). Concentration: AD brain seed: 3.1 μg/μL (total ~7.75 μg per site). CBD brain seed: 3.0 μg/μL (total ~7.5 μg per site). Source: Supplementary Fig. 5A and "Stereotactic injection" section. Cellular Seeds: Derived from 7 × 10⁷ S…	Tau Fibril Preparation: Sarkosyl-insoluble pellets were isolated via ultracentrifugation (100,000 ×g) and washed with sterile saline. Purity was assessed by Western blotting using anti-tau (T46) and cleavage-specific antibodies (e.g., anti-A168). No quantitative purity metrics (e.g., %) were provided. Recombinant LGMN: Purchased from R&D Systems; activated in pH 4.0 buffer.	Stereotactic Coordinates (relative to bregma): Striatum: Dorsoventral: +0.2 mm Lateral: +2.3 mm Depth: −3.1 mm (from dura mater). Overlying Cortex: Dorsoventral: +0.2 mm Lateral: +2.3 mm Depth: −1.7 mm (from dura mater). Unilateral Double Injection: Two sites per mouse (striatum + cortex). Source: "Stereotactic injection of tau seeds" section.	Frequency of Injection: Single Administration: Mice received one injection per site (no repeated injections over time). Time Points Analyzed: Pathology assessed at 3, 6, and 9 months post-injection (mpi). Rate of Injection: Not Explicitly Stated: The paper does not specify the infusion rate (e.g., μL/min). The total volume (2.5 μL per site) was likely injected manually or via a pump at a standard…	CBD Brains: Detergent-insoluble 37–40 kDa carboxyl-terminal tau fragments (CTFs) were hallmark pathological features (Fig. 1F). Anti-A168 and anti-T169 antibodies recognized upper bands of 37–40 kDa CTFs in CBD (blue arrowheads, Fig. 1F). Mouse Models: At 9 months post-injection (mpi), CBD-type cellular seeds induced astrocytic plaque-like pathology in the cortex (Fig. 6E-I). Neuronal pretangle-l…	Injection Sites: Tau seeds were injected into the right striatum and overlying cortex (coordinates: +0.2 mm dorsoventral, +2.3 mm lateral). Spread: By 9 mpi, pathology extended to the ipsilateral cortex (Fig. 6E-F) and corpus callosum (Fig. 6H). No quantitative distance measurements were provided, but regional spread was described.	Human Brains: CBD and PSP: Exclusively 4-repeat (4R) tau isoforms (Fig. 1F, Supplementary Fig. 1A). AD: Both 3-repeat (3R) and 4R isoforms (32 kDa bands in AD likely derived from 3R tau; Fig. 1F). Mouse Models: Amplified tau seeds retained original isoform specificity (CBD: 4R; AD: 3R/4R) (Fig. 6B).	Human CBD: Astrocytic plaques (cortex), pretangles (neurons), and threads/coiled bodies (subcortical white matter) (Fig. 2C, 3C). Mouse Models: 3 mpi: Tau pathology localized to injection sites (striatum/cortex) and corpus callosum (Supplementary Fig. 4A-B). 6–9 mpi: Spread to cortical astrocytes (astrocytic plaques) and widespread oligodendroglial threads (Fig. 6E-I).	Astrocytes: GFAP-positive astrocytes harbored anti-AT8-positive plaques in CBD mice (Fig. 6I). Microglia: LGMN localization in microglia did not differ between tauopathies (Supplementary Fig. 3A).	LGMN Resistance: CBD tau fibrils resisted cleavage at Asn368, preserving 37–40 kDa CTFs (Fig. 4A-B). In AD/PSP, LGMN cleaved tau at Asn368, degrading A168-CTFs over time (Fig. 4B; p < 0.05, ANOVA). Guanidine Hydrochloride Treatment: Unfolded CBD tau became susceptible to LGMN cleavage (Fig. 4C).	Cellular Amplification: CBD-type seeds retained resistance to LGMN cleavage (Fig. 5B). Seeding Specificity: CBD seeds preferentially seeded C-terminal GFP-tagged CTFs (Fig. 5D; p < 0.01, paired t-test).	Cellular Models: CBD seeds showed higher seeding activity for C-terminal-tagged CTFs vs. AD seeds (Fig. 5D; p < 0.01). Mouse Models: CBD seeds induced pathology by 3 mpi, while AD seeds required longer incubation (Supplementary Fig. 4F-G).	NeuN Counts: Not quantified. Neuronal pretangle-like structures were observed but neuronal loss was not explicitly measured (Fig. 6G).	Human CBD: Subcortical threads colocalized with myelin basic protein (MBP) (Supplementary Fig. 2). Mouse Models: Oligodendroglial CB-like structures and threads were prominent in the corpus callosum (Fig. 6H, Supplementary Fig. 4B).	Human CBD: Pretangles (anti-N368-negative) matured into NFTs (anti-N368-positive) (Fig. 3E). Mouse Models: Filamentous pretangle-like structures in mice partially retained anti-N368 reactivity (Fig. 6J).	NR	NR	Partial colocalization of AT8-positive threads with neurofilament (NF) in human CBD (Supplementary Fig. 2), suggesting axonal involvement. No quantitative data provided.	NR	NR	NR	Anti-N368: CBD: Astrocytic plaques were anti-N368-negative (Fig. 3C-D; p < 0.0001, t-test). AD/PSP: NFTs and tufted astrocytes were anti-N368-positive (Fig. 3A-B). Anti-A168/T169: Colocalized with phospho-tau in mature inclusions (Fig. 2).	NR	CBD Pathology: Cortical astrocytic plaques, subcortical oligodendroglial threads (Fig. 6F, Supplementary Fig. 2). Mouse Models: Pathology spread from injection sites (striatum/cortex) to corpus callosum and distal cortex (Fig. 6E-F).	Threads and CBs were anti-N368-positive in mice (Fig. 6J), contrasting with human CBD (anti-N368-negative).
