# Supplementary material for: Comparative Analysis of Primary (3R/4R) versus Secondary (3R + 4R) Tauopathy Strains in Rodent Models: A Systematic Review
Source: Research Square preprint supplement (doi:10.21203/rs.3.rs-8090222/v1), 2025-12-02
Supplement: Supplementary file 4 [file bfc01f995c351d5b4c5ec8e0.docx]

**PRISMA 2020 flow diagram for new systematic reviews which included searches of databases and registers only**


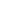


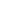

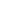


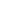


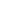


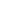


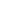

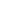

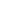


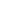


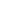

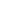

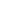


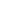


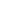


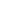

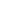

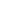


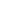


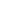


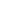


Source: Page MJ, et al. BMJ 2021;372:n71. doi: 10.1136/bmj.n71.

This work is licensed under CC BY 4.0. To view a copy of this license, visit <https://creativecommons.org/licenses/by/4.0/>
